# Supplementary material
Source: PubMed Central journal article supplement (PMC4884120)
Supplement: ASN.2015060648_ASN2015060648SupplementaryData.pdf [file ASN.2015060648_ASN2015060648SupplementaryData.pdf]

## **Supplementary Information**

Refining genotype-phenotype correlation in autosomal dominant polycystic kidney disease

Young-Hwan Hwang,\* John Conklin,\* Winnie Chan, Nicole M. Roslin, Jannel Liu,  
Ning He, Kairong Wang, Jamie L. Sundsbak, Christina M. Heyer, Masoom Haider,  
Andrew D. Paterson, Peter C. Harris, and York Pei.

## **Supplemental Data**

**Table S1. Characteristics of probands at recruitment**

**Table S2. *PKD1* protein-truncating mutations in study families**

**Table S3. *PKD1* non-truncating mutations in study families**

**Table S4. *PKD1* in-frame insertion/deletions in study families**

**Table S5. *PKD2* mutations in study families**

**Table S6. Predicted pathogenic missense mutations in study families**

**A note on the multivariate Cox proportional hazard model used for the study**

**Table S1. Characteristics of probands at recruitment (N=220)**

---

|                                 |             |
|---------------------------------|-------------|
| <b>Age (years)</b>              | 38.9 ± 12.7 |
| <b>Male (%)</b>                 | 55.0        |
| <b>Ethnicity (%)</b>            |             |
| European                        | 79.5        |
| East Asian                      | 8.2         |
| South Asian                     | 2.7         |
| Black                           | 3.6         |
| Arabian                         | 4.5         |
| Others                          | 1.4         |
| <b>Serum creatinine (mg/dL)</b> | 0.90 ± 0.19 |

---

**Table S2. *PKD1* protein-truncating (PT) mutations in study families**

| Family No.   | Exon  | Codon | cDNA change                       | Protein change | Predicted Effect | PKDB  |
|--------------|-------|-------|-----------------------------------|----------------|------------------|-------|
| TOR43        | 1     | 56    | c.166_167insCGCGGGC               | p.Pro56fs59X   | Frameshift       | novel |
| TOR2         | 3     | 96    | c.288_359del*                     | p.Leu96fs      | Large deletion   | novel |
| TOR324       | 3     | 97    | c.290delA                         | p.Asp97fs2X    | Frameshift       | novel |
| TOR263       | 3     | 116   | c.348_352delTTTAA                 | p.Asn116fs1X   | Frameshift       | 1x    |
| TOR198       | 5     | 211   | c.631_632insTTCAGCCCACAGGC...     | p.Ser211fs76X  | Frameshift       | novel |
| TOR363       | 5     | 231   | c.692_693dupT                     | p.Leu231fs29X  | Frameshift       | novel |
| TOR154 & 225 | 5     | 286   | c.856_862delTCTGGCC               | p.Ser286fs1X   | Frameshift       | 3x    |
| TOR379       | 8     | 559   | c.1674delG                        | p.Pro559fs24X  | Frameshift       | novel |
| TOR329       | 10    | 672   | c.2016dupG                        | p.Gly672fs40X  | Frameshift       | 1x    |
| TOR141       | 10    | 696   | c.2085dupC                        | p.Ala696fs17X  | Frameshift       | 7x    |
| TOR137       | 11    | 705   | c.2113C>T                         | p.Gln705X      | Nonsense         | 1x    |
| TOR242       | 11    | 812   | c.2433_2434delCT                  | p.Ser812fs85X  | Frameshift       | novel |
| TOR308       | 11    | 869   | c.2607delC                        | p.Arg869fs28X  | Frameshift       | novel |
| TOR253       | 11    | 873   | c.2618_2621delTCTG                | p.Val873fs23X  | Frameshift       | 1x    |
| TOR300       | 11    | 885   | c.2652dupC                        | p.Cys885fs19X  | Frameshift       | novel |
| TOR346       | 12    | 972   | c.2914A>T                         | p.Lys972X      | Nonsense         | novel |
| TOR410       | IVS12 | 995   | c.2986-2A>G                       | p.Ser995fs     | Splice site      | novel |
| TOR250       | 14    | 1065  | c.3194_3209delACCAGTTCAGCCTC<br>C | p.His1065fs33X | Frameshift       | 1x    |
| TOR279       | 15    | 1210  | c.3628G>T                         | p.Glu1210X     | Nonsense         | 1x    |

|              |    |      |                          |                 |            |       |
|--------------|----|------|--------------------------|-----------------|------------|-------|
| TOR331       | 15 | 1347 | c.4041_4042delCA         | p.His1347fs82X  | Frameshift | novel |
| TOR88        | 15 | 1436 | c.4306C>T                | p.Arg1436X      | Nonsense   | 1x    |
| TOR244       | 15 | 1582 | c.4746G>A                | p.Trp1582X      | Nonsense   | 3x    |
| TOR159       | 15 | 1599 | c.4797C>G                | p.Tyr1599X      | Nonsense   | novel |
| TOR314       | 15 | 1627 | c.4880delA               | p.Tyr1627fs6X   | Frameshift | novel |
| TOR196       | 15 | 1630 | c.4888C>T                | p.Gln1630X      | Nonsense   | 1x    |
| TOR192       | 15 | 1664 | c.4992C>G                | p.Tyr1664X      | Nonsense   | novel |
| TOR403 & 377 | 15 | 1672 | c.5014_5015delAG         | p.Arg1672fs97X  | Frameshift | 29x   |
| TOR136       | 15 | 1693 | c.5079C>A                | p.Tyr1693X      | Nonsense   | 2x    |
| TOR139       | 15 | 1696 | c.5086C>T                | p.Gln1696X      | Nonsense   | 3x    |
| TOR189       | 15 | 1963 | c.5887dupG               | p.Val1963fs26X  | Frameshift | novel |
| TOR178       | 15 | 2039 | c.6115C>T                | p.Gln2039X      | Nonsense   | 1x    |
| TOR66 & 248  | 15 | 2136 | c.6406C>T                | p.Gln2136X      | Nonsense   | 3x    |
| TOR316       | 15 | 2196 | c.6586C>T                | p.Gln2196X      | Nonsense   | 1x    |
| TOR392       | 15 | 2243 | c.6727_6728delCA         | p.Gln2243fs17X  | Frameshift | 2x    |
| TOR12        | 15 | 2265 | c.6795C>A                | p.Tyr2265X      | Nonsense   | 1x    |
| TOR302       | 16 | 2354 | c.7060C>T                | p.Gln2354X      | Nonsense   | 1x    |
| TOR48        | 17 | 2402 | c.7204C>T                | p.Arg2402X      | Nonsense   | 2x    |
| TOR38 & 4    | 18 | 2430 | c.7288C>T                | p.Arg2430X      | Nonsense   | 7x    |
| TOR261       | 18 | 2449 | c.7346_7347insA          | p.Thr2449fs51X  | Frameshift | novel |
| TOR374       | 18 | 2474 | c.7421_7430delGCTCTTGCCG | p.Gly2474fs142X | Frameshift | novel |

|        |       |      |                             |                 |             |       |
|--------|-------|------|-----------------------------|-----------------|-------------|-------|
| TOR388 | 18    | 2476 | c.7426_7429delTGCC          | p.Cys2476fs142X | Frameshift  | 1x    |
| TOR186 | 19    | 2556 | c.7666C>T                   | p.Gln2556X      | Nonsense    | 7x    |
| TOR291 | 21    | 2639 | c.7915C>T                   | p.Arg2639X      | Nonsense    | 5x    |
| TOR17  | 22    | 2706 | c.8116_8125delACCGTGACGC    | p.Thr2706fs46X  | Frameshift  | novel |
| TOR304 | 23    | 2810 | c.8428G>T                   | p.Glu2810X      | Nonsense    | 3x    |
| TOR089 | 25    | 3000 | c.8998delC                  | p.Arg3000fs73X  | Frameshift  | novel |
| TOR386 | IVS27 | 3196 | c.9568+1G>T                 | p.Leu3196fs     | Splice site | novel |
| TOR361 | 30    | 3319 | c.9957_9958delCG            | p.Ser3319fs69X  | Frameshift  | 1x    |
| TOR412 | IVS31 | 3390 | c.10171-1G>C                | p.Gln3390fs     | Splice site | novel |
| TOR16  | IVS33 | 3469 | c.10405+1G>A                | p.Asp3469fs     | Splice site | novel |
| TOR328 | 35    | 3509 | c.10525_10526delGA          | p.Glu3509fs225X | Frameshift  | novel |
| TOR197 | 36    | 3550 | c.10648_10658delCTGCCGGCCTG | p.L3550fs72X    | Frameshift  | Novel |
| TOR404 | 36    | 3551 | c.10652_10662delCGGCCTGGTGT | p.Pro3551fs111X | Frameshift  | Novel |
| TOR383 | IVS36 | 3607 | c.10821+1G>A                | p.Lys3607fs     | Splice site | novel |
| TOR126 | 39    | 3734 | c.11202C>A                  | p.Tyr3734X      | Nonsense    | novel |
| TOR182 | 40    | 3773 | c.11314_11317dup            | p.Ala3773fs43X  | Frameshift  | novel |
| TOR254 | 40    | 3781 | c.11343C>G                  | p.Tyr3781X      | Nonsense    | 2x    |
| TOR293 | 40    | 3793 | c.11378delG                 | p.Gly3793fs32X  | Frameshift  | novel |
| TOR303 | 40    | 3798 | c.11393C>G                  | p.Ser3798X      | Nonsense    | novel |
| TOR229 | 42    | 3851 | c.11553delC                 | p.Phe3851fs91X  | Frameshift  | novel |
| TOR309 | 43    | 3922 | c.11766G>A                  | p.Trp3922X      | Nonsense    | 3x    |

|              |    |      |             |            |          |       |
|--------------|----|------|-------------|------------|----------|-------|
| TOR393       | 43 | 3979 | c.11935C>T  | p.Gln3979X | Nonsense | 2x    |
| TOR378       | 44 | 4004 | c.12010C>T  | p.Gln4004X | Nonsense | 4x    |
| TOR266 & 270 | 44 | 4011 | c.12031C>T  | p.Gln4011X | Nonsense | 4x    |
| TOR354       | 44 | 4021 | c.12061C>T  | p.Arg4021X | Nonsense | 5x    |
| TOR195       | 44 | 4042 | c.12124C>T  | p.Gln4042X | Nonsense | 8x    |
| TOR296       | 46 | 4209 | c.12624dupT | p.Glu4209X | Nonsense | novel |

Recurrent mutations within the study are highlighted by shaded bars.

**Table S3. *PKDI* non-truncating (NT) mutations in study families**

| Family No. | Exon | Codon | cDNA change | Protein change | Specific Mutation    | PKDB  |
|------------|------|-------|-------------|----------------|----------------------|-------|
| TOR271     | 5    | 410   | c.1202-9G>A | p.Ala410fs     | Atypical splice site | 1x    |
| TOR360     | 6    | 421   | c.1261C>T   | p.Arg421Cys    | Missense             | novel |
| TOR392     | 6    | 429   | c.1286G>T   | p.Trp429Leu    | Missense             | 1x    |
| TOR385     | 6    | 432   | c.1295C>T   | p.Ala432Val    | Missense             | 2x    |
| TOR241     | 6    | 436   | c.1306T>C   | p.Cys436Arg    | Missense             | 1x    |
| TOR351     | 6    | 456   | c.1367T>C   | p.Leu456Pro    | Missense             | novel |
| TOR276     | 7    | 466   | c.1396G>A   | p.Val466Met    | Missense             | 2x    |
| TOR406     | 7    | 531   | c.1591G>A   | p.Glu531Lys    | Missense             | novel |
| TOR318     | 11   | 727   | c.2180T>C   | p.Leu727Pro    | Missense             | 7x    |
| TOR395     | 11   | 899   | c.2696C>G   | p.Leu899Val    | Missense             | novel |
| TOR356     | 12   | 967   | c.2899T>C   | p.Trp967Arg    | Missense             | 4x    |
| TOR366     | 13   | 998   | c.2992G>C   | p.Ala998Pro    | Missense             | novel |
| TOR175     | 14   | 1095  | c.3284A>G   | p.Tyr1095Cys   | Missense             | novel |
| TOR335     | 15   | 1164  | c.3490G>C   | p.Gly1164Arg   | Missense             | novel |
| TOR342     | 15   | 1319  | c.3955G>A   | p.Gly1319Arg   | Missense             | novel |
| TOR323     | 15   | 1350  | c.4049C>T   | p.Thr1350Met   | Missense             | 1x    |
| TOR319     | 15   | 1870  | c.5609A>G   | p.Asn1870Ser   | Missense             | novel |
| TOR256     | 15   | 1999  | c.5995G>A   | p.Gly1999Ser   | Missense             | 2x    |
| TOR200     | 15   | 2166  | c.6496C>T   | p.Arg2166Cys   | Missense             | 4x    |



|         |    |      |                                          |                |                      |       |
|---------|----|------|------------------------------------------|----------------|----------------------|-------|
| TOR237  | 15 | 2215 | c.6643C>T                                | p.Arg2215Trp   | Missense             | 1x    |
| TOR347  | 15 | 2305 | c.6916-9G>A                              | p.Gln2305fs10X | Atypical splice site | 2x    |
| TOR307  | 17 | 2363 | c.7088T>A                                | p.Val2363Glu   | Missense             | 1x    |
| TOR343  | 18 | 2470 | c.7409C>T                                | p.Pro2470Leu   | Missense             | novel |
| TOR406  | 18 | 2494 | c.7480G>A                                | p.Glu2494Lys   | Missense             | novel |
| TOR202  | 19 | 2516 | c.7546C>T                                | p.Arg2516Cys   | Missense             | 8x    |
| TOR190  | 23 | 2752 | c.8255C>A                                | p.Ala2752Asp   | Missense             | 1x    |
| TOR179* | 23 | 2767 | c.8299C>T                                | p.Arg2767Cys   | Missense             | 3x    |
| TOR227  | 23 | 2786 | c.8356A>G                                | p.Lys2786Glu   | Missense             | novel |
| TOR368  | 23 | 2822 | c.8464G>A                                | p.Val2822Met   | Missense             | 2x    |
| TOR327  | 23 | 2835 | c.8504C>T                                | p.Pro2835Leu   | Missense             | novel |
| TOR119  | 23 | 2920 | c.8759T>C                                | p.Leu2920Pro   | Missense             | novel |
| TOR61   | 23 | 2931 | c.8791+5G>C                              | p.Gly2931fs    | Atypical splice site | 1x    |
| TOR285  | 25 | 3010 | c.9029T>A                                | p.Leu3010Gln   | Missense             | novel |
| TOR371  | 25 | 3052 | c.9154G>C                                | p.Gly3052Arg   | Missense             | novel |
| TOR240  | 25 | 3067 | c.9202-16G>A                             | p.Pro3067fs    | Atypical splice site | 2x    |
| TOR401  | 27 | 3188 | c.9563A>C                                | p.Asn3188Thr   | Missense             | novel |
| TOR102  | 29 | 3264 | c.9791T>C                                | p.Leu3264Pro   | Missense             | novel |
| TOR193  | 31 | 3390 | c.10167+25_+43delGGCTG<br>GGCTGGGGGTCCTG | p.Gln3390fs    | Atypical splice site | 4x    |
| TOR288  | 36 | 3599 | c.10796C>T                               | p.Ser3599Leu   | Missense             | 1x    |
| TOR235  | 37 | 3613 | c.10838T>C                               | p.Leu3613Pro   | Missense             | novel |

|              |    |      |            |              |          |       |
|--------------|----|------|------------|--------------|----------|-------|
| TOR249       | 37 | 3643 | c.10927G>A | p.Val3643Met | Missense | novel |
| TOR103       | 37 | 3657 | c.10969G>C | p.Ala3657Asp | Missense | novel |
| TOR330       | 37 | 3658 | c.10972A>G | p.Lys3658Glu | Missense | novel |
| TOR264       | 39 | 3753 | c.11258G>A | p.Arg3753Gln | Missense | novel |
| TOR134 & 358 | 39 | 3753 | c.11257C>T | p.Arg3753Trp | Missense | 4x    |
| TOR405       | 43 | 3915 | c.11744C>A | p.Ala3915Asp | Missense | novel |
| TOR087*      | 45 | 4054 | c.12161C>T | p.Ser4054Phe | Missense | 1x    |
| TOR18        | 46 | 4150 | c.12448C>T | p.Arg4150Cys | Missense | 2x    |
| TOR118 & 181 | 46 | 4155 | c.12465T>G | p.Phe4155Leu | Missense | 1x    |
| TOR294       | 46 | 4211 | c.12632A>T | p.Glu4211Val | Missense | novel |

\*Family with bilineal ADPKD; recurrent mutations are highlighted by shaded bars.

**Table S4. *PKDI* in-frame insertion/deletions (IF indels) in study families**

| Family No. | Exon | Codon | cDNA change                         | Protein change                  | Domain                    | PKDB  | PROVEAN | Segregation <sup>†</sup> |
|------------|------|-------|-------------------------------------|---------------------------------|---------------------------|-------|---------|--------------------------|
| TOR161     | 15   | 1661  | c.4981_4983delAAC                   | p.Asn1661del                    | PKD12                     | novel | -10.311 | ++                       |
| TOR224     | 15   | 1996  | c.5986_5994delGTGCAGCG<br>C         | p.Val1996_Arg1998del3           | PKD16                     | novel | -11.406 | ++                       |
| TOR411     | 15   | 2224  | c.6672_6673insGTGGGGCA<br>CTACTGC   | p.Pro2224_Val2225insVG<br>HYC   | REJ                       | novel | -10.395 | +                        |
| TOR163     | 23   | 2763  | c.8287_8289delCTC                   | p.Leu2763del                    | REJ                       | 1x    | -8.788  | ++                       |
| TOR367     | 40   | 3778  | c.11332_11340delACCAGCG<br>ATinsTGG | p.Thr3778_Asp3780del3ins<br>Trp | Extracellular             | novel | -9.254  | +                        |
| TOR338     | 43   | 3969  | c.11905_11916delGGCCGCC<br>CGCGC    | p.Gly3969_Arg3972del4           | Extracellular             | novel | -6.505  |                          |
| TOR087*    | 45   | 4130  | c.12389_12391delTGG                 | p.Val4130del                    | C-terminal<br>cytoplasmic | 1x    | -11.002 | ++                       |
| TOR72      | 45   | 4131  | c.12391_12393delGAG                 | p.Glu4131del                    | C-terminal<br>cytoplasmic | 1x    | -13.037 | +++                      |

\*Family with bilineal ADPKD; †variant segregated with 1-2 (+), 3-4 (++), and  $\geq 5$  disease-informative family members (i.e. affected or unaffected older than age 40 years)

**Table S5. PKD2 mutations in study families**

| Family No.                          | Exon | Codon | cDNA change                                                              | Protein change | Predicted Effect     | PKDB  |
|-------------------------------------|------|-------|--------------------------------------------------------------------------|----------------|----------------------|-------|
| TOR257 & 223                        | 1~15 | 1     | c.1_2907del*                                                             | p.Met1fs       | Large del            | novel |
| TOR373 & 408                        | 1    | 42    | c.124_125InsGACCCGGGCCGGC<br>TGATGGCTGGCTGCGCGGCCG<br>TGGGCGCCAGCCTCGCCG | p.Ala42fs66X   | Frameshift           | 2x    |
| TOR213                              | 1    | 68    | c.203dupC                                                                | p.Pro68fs23X   | Frameshift           | 11x   |
| TOR380                              | 1    | 135   | c.405delC                                                                | p.Gly135fs97X  | Frameshift           | novel |
| TOR185                              | 1    | 180   | c.539delT                                                                | p.Leu180fs52X  | Frameshift           | novel |
| TOR396 & 233                        | 1    | 189   | c.567G>A                                                                 | p.Trp189X      | Nonsense             | 1x    |
| TOR259                              | 2    | 201   | c.602G>A                                                                 | p.Trp201X      | Nonsense             | 1x    |
| TOR176 & 413                        | IVS2 | 237   | c.709+1G>A                                                               | p.Leu237fs     | Splice site          | 4x    |
| TOR201                              | IVS2 | 237   | c.710-2A>G                                                               | p.Leu237fs     | Splice site          | 1x    |
| TOR334                              | IVS2 | 237   | c.710-10T>G                                                              | p.Leu237fs     | Atypical splice site | novel |
| TOR187                              | IVS3 | 281   | c.844-2A>C                                                               | p.Lys281fs     | Splice site          | novel |
| TOR216                              | 4    | 320   | c.958C>T                                                                 | p.Arg320X      | Nonsense             | 7x    |
| TOR210, 212 & 232                   | 4    | 325   | c.973C>T                                                                 | p.Arg325X      | Nonsense             | 6x    |
| TOR29 & 221                         | 4    | 325   | c.974G>A                                                                 | p.Arg325Gln    | Missense             | 3x    |
| TOR394                              | IVS4 | 365   | c.1094+1G>A                                                              | p.Ala365fs     | splice site          | 1x    |
| TOR105, 107 & 387                   | IVS4 | 365   | c.1094+3_+6delGTAA                                                       | p.Ala365fs     | Atypical splice site | 4x    |
| TOR290 & 344                        | 5    | 392   | c.1175dupA                                                               | p.Trp392X      | Nonsense             | novel |
| TOR177, 191, 204, 376,<br>214 & 215 | 5    | 417   | c.1249C>T                                                                | p.Arg417X      | Nonsense             | 10x   |
| TOR31                               | IVS5 | 439   | c.1319+1G>A                                                              | p.Arg439fs     | Splice site          | 8x    |
| TOR220                              | 6    | 449   | c.1339_1345dup                                                           | p.Gly449fs23X  | Frameshift           | 2x    |
| TOR206                              | IVS6 | 517   | c.1549-2A>G                                                              | p.Leu517fs     | Splice site          | novel |

|                      |       |     |                    |              |                      |       |
|----------------------|-------|-----|--------------------|--------------|----------------------|-------|
| TOR398               | 7     | 537 | c.1609C>T          | p.Gln537X    | Nonsense             | 1x    |
| TOR208               | 7     | 569 | c.1704dupT         | p.Val569fs3X | Frameshift           | novel |
| TOR74                | 8     | 632 | c.1894T>C          | p.Cys632Arg  | Missense             | 1x    |
| TOR101               | IVS8  | 633 | c.1898+5G>A        | p.Ile633fs   | Atypical splice site | 4x    |
| TOR209               | 9     | 654 | c.1960C>T          | p.Arg654X    | Nonsense             | 5x    |
| TOR104               | 9     | 666 | c.1998_2001delCTTT | p.Phe666fs6X | Frameshift           | 1x    |
| TOR217               | IVS10 | 706 | c.2118-2A>G        | p.Lys706fs   | Splice site          | 1x    |
| TOR130, 8, 77 & 179* | 11    | 720 | c.2159dupA         | p.Asn720fs4X | Frameshift           | 10x   |
| TOR203               | IVS11 | 747 | c.2240+1G>C        | p.Gly747fs   | Splice site          | novel |
| TOR325               | IVS12 | 786 | c.2358+1G>A        | p.Arg786fs   | Splice site          | 1x    |
| TOR219               | 13    | 803 | c.2407C>T          | p.Arg803X    | Nonsense             | 6x    |
| TOR390               | 13    | 812 | c.2435_2436delCT   | p.Ser812X    | Nonsense             | novel |
| TOR218 & 375         | 14    | 845 | c.2533C>T          | p.Arg845X    | Nonsense             | 3x    |
| TOR402               | 14    | 850 | c.2548G>T          | p.Glu850X    | Nonsense             | novel |
| TOR262 & 350         | 14    | 872 | c.2614C>T          | p.Arg872X    | Nonsense             | 16x   |
| TOR122               | 15    | 969 | c.2906G>T          | p.X969Leu    | Nonstop mutation     | novel |

\*Family with bilineal ADPKD; recurrent mutations are highlighted by shaded bars.

**Table S6. Predicted pathogenic missense mutations in study families**

| Family No. | Gene | Exon | Codon | cDNA change | Protein change | Domain <sup>†</sup> | PKDB  | Polyphen-2 | SIFT | Segregation <sup>†</sup> |
|------------|------|------|-------|-------------|----------------|---------------------|-------|------------|------|--------------------------|
| TOR360     | PKD1 | 6    | 421   | c.1261C>T   | p.Arg421Cys    | C-lectin            | novel | 0.879      | 0.02 | +++                      |
| TOR392     | PKD1 | 6    | 429   | c.1286G>T   | p.Trp429Leu    | C-lectin            | 1x    | 0.985      | 0    | ++                       |
| TOR385     | PKD1 | 6    | 432   | c.1295C>T   | p.Ala432Val    | C-lectin            | 2x    | 0.991      | 0    | +                        |
| TOR241     | PKD1 | 6    | 436   | c.1306T>C   | p.Cys436Arg    | C-lectin            | 1x    | 0.310      | 0    | +                        |
| TOR351     | PKD1 | 6    | 456   | c.1367T>C   | p.Leu456Pro    | C-lectin            | novel | 0.990      | 0    |                          |
| TOR276     | PKD1 | 7    | 466   | c.1396G>A   | p.Val466Met    | C-lectin            | 2x    | 0.961      | 0.01 | ++                       |
| TOR318     | PKD1 | 11   | 727   | c.2180T>C   | p.Leu727Pro    | .                   | 7x    | 0.990      | 0    | +                        |
| TOR395     | PKD1 | 11   | 899   | c.2696C>G   | p.Leu899Val    | PKD3                | novel | 0.784      | 0.02 | +                        |
| TOR356     | PKD1 | 12   | 967   | c.2899T>C   | p.Trp967Arg    | PKD4                | 4x    | 1.000      | 0    | +                        |
| TOR366     | PKD1 | 13   | 998   | c.2992G>C   | p.Ala998Pro    | PKD4                | novel | 1.000      | 0    | +                        |
| TOR175     | PKD1 | 14   | 1095  | c.3284A>G   | p.Tyr1095Cys   | PKD5                | novel | 0.994      | 0    | +++                      |
| TOR335     | PKD1 | 15   | 1164  | c.3490G>C   | p.Gly1164Arg   | PKD6                | novel | 1.000      | 0    | +                        |
| TOR342     | PKD1 | 15   | 1319  | c.3955G>A   | p.Gly1319Arg   | PKD8                | novel | 1.000      | 0    | +                        |
| TOR323     | PKD1 | 15   | 1350  | c.4049C>T   | p.Thr1350Met   | PKD8                | 1x    | 0.971      | 0.09 | ++                       |
| TOR319     | PKD1 | 15   | 1870  | c.5609A>G   | p.Asn1870Ser   | PKD14               | novel | 0.999      | 0    |                          |
| TOR256     | PKD1 | 15   | 1999  | c.5995G>A   | p.Gly1999Ser   | PKD16               | 2x    | 0.999      | 0.3  | ++                       |
| TOR200     | PKD1 | 15   | 2166  | c.6496C>T   | p.Arg2166Cys   | REJ                 | 4x    | 0.983      | 0.03 | +                        |
| TOR237     | PKD1 | 15   | 2215  | c.6643C>T   | p.Arg2215Trp   | REJ                 | 1x    | 0.862      | 0.01 | +                        |
| TOR307     | PKD1 | 17   | 2363  | c.7088T>A   | p.Val2363Glu   | REJ                 | 1x    | 0.993      | 0.03 |                          |

|            |      |    |      |            |              |               |       |       |      |     |
|------------|------|----|------|------------|--------------|---------------|-------|-------|------|-----|
| TOR343     | PKD1 | 18 | 2470 | c.7409C>T  | p.Pro2470Leu | REJ           | novel | 0.998 | 0.01 | +   |
| TOR406     | PKD1 | 18 | 2494 | c.7480G>A  | p.Glu2494Lys | REJ           | novel | 0.939 | 0.24 | +   |
| TOR202     | PKD1 | 19 | 2516 | c.7546C>T  | p.Arg2516Cys | REJ           | 8x    | 1.000 | 0.01 | ++  |
| TOR190     | PKD1 | 23 | 2752 | c.8255C>A  | p.Ala2752Asp | REJ           | 1x    | 1.000 | 0    | ++  |
| TOR179*    | PKD1 | 23 | 2767 | c.8299C>T  | p.Arg2767Cys | REJ           | 3x    | 1.000 | 0    | +   |
| TOR227     | PKD1 | 23 | 2786 | c.8356A>G  | p.Lys2786Glu | REJ           | novel | 0.998 | 0.05 | +   |
| TOR368     | PKD1 | 23 | 2822 | c.8464G>A  | p.Val2822Met | REJ           | 2x    | 0.906 | 0    |     |
| TOR327     | PKD1 | 23 | 2835 | c.8504C>T  | p.Pro2835Leu | .             | novel | 1.000 | 0.01 | +   |
| TOR119     | PKD1 | 23 | 2920 | c.8759T>C  | p.Leu2920Pro | .             | novel | 0.987 | 0.01 | +   |
| TOR285     | PKD1 | 25 | 3010 | c.9029T>A  | p.Leu3010Gln | .             | novel | 0.979 | 0.03 | +   |
| TOR371     | PKD1 | 25 | 3052 | c.9154G>C  | p.Gly3052Arg | GPS           | novel | 0.998 | 0    | +++ |
| TOR401     | PKD1 | 27 | 3188 | c.9563A>C  | p.Asn3188Thr | PLAT          | novel | 1.000 | 0    | ++  |
| TOR102     | PKD1 | 29 | 3264 | c.9791T>C  | p.Leu3264Pro | Cytoplasmic   | novel | 0.996 | 0    | ++  |
| TOR288     | PKD1 | 36 | 3599 | c.10796C>T | p.Ser3599Leu | TM domain     | 1x    | 0.999 | 0    | +   |
| TOR235     | PKD1 | 37 | 3613 | c.10838T>C | p.Leu3613Pro | Cytoplasmic   | novel | 0.987 | 0.01 |     |
| TOR249     | PKD1 | 37 | 3643 | c.10927G>A | p.Val3643Met | Cytoplasmic   | novel | 0.925 | 0.18 |     |
| TOR103     | PKD1 | 37 | 3657 | c.10969G>C | p.Ala3657Asp | Cytoplasmic   | novel | 0.935 | 0.03 | +++ |
| TOR330     | PKD1 | 37 | 3658 | c.10972A>G | p.Lys3658Glu | Cytoplasmic   | novel | 0.214 | 0.03 |     |
| TOR264     | PKD1 | 39 | 3753 | c.11258G>A | p.Arg3753Gln | Extracellular | novel | 0.998 | 0    | ++  |
| TOR134&358 | PKD1 | 39 | 3753 | c.11257C>T | p.Arg3753Trp | Extracellular | 4x    | 0.994 | 0    | ++  |
| TOR405     | PKD1 | 43 | 3915 | c.11744C>A | p.Ala3915Asp | TM domain     | novel | 0.242 | 0.02 |     |

|            |      |    |      |            |              |                           |       |       |      |   |
|------------|------|----|------|------------|--------------|---------------------------|-------|-------|------|---|
| TOR087*    | PKD1 | 45 | 4054 | c.12161C>T | p.Ser4054Phe | Extracellular             | 1x    | 0.917 | 0.02 | + |
| TOR18      | PKD1 | 46 | 4150 | c.12448C>T | p.Arg4150Cys | Cytoplasmic<br>C-terminal | 2x    | 1.000 | 0    |   |
| TOR118&181 | PKD1 | 46 | 4155 | c.12465T>G | p.Phe4155Leu | Cytoplasmic<br>C-terminal | 1x    | 0.997 | 0.01 | + |
| TOR294     | PKD1 | 46 | 4211 | c.12632A>T | p.Glu4211Val | Cytoplasmic<br>C-terminal | novel | 0.554 | 0.01 |   |
| TOR29&221  | PKD2 | 4  | 325  | c.974G>A   | p.Arg325Gln  | Extracellular             | 3x    | 0.891 | 0.01 |   |
| TOR74      | PKD2 | 8  | 632  | c.1894T>C  | p.Cys632Arg  | Extracellular             | 1x    | 0.588 | 0.01 |   |

<sup>†</sup>Domain is annotated according to the UniProtKB ([www.uniprot.org](http://www.uniprot.org)); <sup>‡</sup>variant segregated with 1-2 (+), 3-4 (++), and  $\geq 5$  disease informative family members (i.e. affected or unaffected older than age 40 years)



### **A note on multivariate Cox proportional hazard model for ESRD and patient death**

We performed multivariate Cox proportional hazard analysis with a frailty model to account for random clustering between related subjects from the same family (**Table 4**). The variance of the frailty (i.e. theta) differed significantly from 0, indicating a significant cluster effect (data not shown). Hence, we used the frailty model instead of a standard Cox model.
